# Supplementary material
Source: PubMed Central journal article supplement (PMC2746013)
Supplement: NIHMS132597-supplement-1_si_001.pdf [file NIHMS132597-supplement-1_si_001.pdf]

## **Supplementary Information**

**Title:** Examination of Enzymatic H-Tunneling through Kinetics and Dynamics.

**Authors:** Jigar N. Bandaria, Christopher M. Cheatum, and Amnon Kohen\*

**Affiliation:** Department of Chemistry, University of Iowa, Iowa City, IA 52242.

**Running title:** Enzyme Kinetics and Dynamics

### **Footnotes:**

\* Author to whom correspondences should be addressed.

E-mail: [amnon-kohen@uiowa.edu](mailto:amnon-kohen@uiowa.edu) Phone #: 319-335-0234

Table S1. HPLC method for separation of NAD<sup>+</sup> and NADH

| Time<br>(min) | %A  | %B | %C  | Flow Rate<br>(ml/min) | Max.<br>Pressure<br>(bar) |
|---------------|-----|----|-----|-----------------------|---------------------------|
| 0             | 100 | 0  | 0   | 0.8                   | 400                       |
| 4.9           | 100 | 0  | 0   | 0.8                   | 400                       |
| 5             | 99  | 1  | 0   | 0.8                   | 400                       |
| 15            | 90  | 10 | 0   | 0.8                   | 400                       |
| 24.9          | 90  | 10 | 0   | 0.8                   | 400                       |
| 25            | 0   | 0  | 100 | 0.8                   | 400                       |
| 35            | 0   | 0  | 100 | 0.8                   | 400                       |

Note: Here Buffer A is 0.1 M phosphate at pH 6.0. Buffer B is a 60:40 mixture of A and methanol, and C is methanol.

Table S2. Observed *V/K* KIEs (with the standard deviation).

| Temperature ° C | Observed H/T KIE | Observed D/T KIE |
|-----------------|------------------|------------------|
| 5               | 3.69±0.09        | 1.57±0.02        |
| 15              | 3.82±0.05        | 1.57±0.05        |
| 25              | 3.80±0.09        | 1.58±0.03        |
| 35              | 3.78±0.05        | 1.57±0.03        |
| 45              | 3.79±0.13        | 1.57±0.02        |

The table contains observed H/T and D/T KIEs obtained from the competitive experiments as describe in the text.

Table S3. Intrinsic KIEs presented in Figure 4 in the main text.

| Temperature ° C | Intrinsic KIE (H/T) | Intrinsic KIE (H/D) | Intrinsic KIE (D/T) |
|-----------------|---------------------|---------------------|---------------------|
| 5               | 5.89±0.79           | 3.14±0.31           | 1.70±0.07           |
| 15              | 5.80±0.70           | 3.38±0.28           | 1.69±0.06           |
| 25              | 5.93±0.73           | 3.43±0.30           | 1.70±0.06           |
| 35              | 5.88±0.75           | 3.41±0.30           | 1.70±0.06           |
| 45              | 5.88±0.62           | 3.41±0.25           | 1.70±0.05           |

The table presents the intrinsic H/T, H/D and D/T KIEs, calculated using the Northrop's method as described in the text. Reported errors are from all combinations of H/T and D/T observed KIEs for each temperature point. Errors were calculated at the 95% confidence interval.
